# Generalized Concentration Addition Modeling Predicts Mixture Effects of Environmental PPAR $\gamma$ Agonists

James Watt, Thomas F. Webster, and Jennifer J. Schlezinger<sup>1</sup>

Boston University School of Public Health, Boston, Massachusetts 02118

<sup>1</sup>To whom correspondence should be addressed at Boston University School of Public Health, 72 E. Concord St. Talbot 4W, Boston, MA 02118. Fax: 617-638-6463. E-mail: jschlezi@bu.edu.

## ABSTRACT

The vast array of potential environmental toxicant combinations necessitates the development of efficient strategies for predicting toxic effects of mixtures. Current practices emphasize the use of concentration addition to predict joint effects of endocrine disrupting chemicals in coexposures. Generalized concentration addition (GCA) is one such method for predicting joint effects of coexposures to chemicals and has the advantage of allowing for mixture components to have differences in efficacy (ie, dose-response curve maxima). Peroxisome proliferator-activated receptor gamma (PPAR $\gamma$ ) is a nuclear receptor that plays a central role in regulating lipid homeostasis, insulin sensitivity, and bone quality and is the target of an increasing number of environmental toxicants. Here, we tested the applicability of GCA in predicting mixture effects of therapeutic (rosiglitazone and nonthiazolidinedione partial agonist) and environmental PPAR $\gamma$  ligands (phthalate compounds identified using EPA's ToxCast database). Transcriptional activation of human PPAR $\gamma$ 1 by individual compounds and mixtures was assessed using a peroxisome proliferator response element-driven luciferase reporter. Using individual dose-response parameters and GCA, we generated predictions of PPAR $\gamma$  activation by the mixtures, and we compared these predictions with the empirical data. At high concentrations, GCA provided a better estimation of the experimental response compared with 3 alternative models: toxic equivalency factor, effect summation and independent action. These alternatives provided reasonable fits to the data at low concentrations in this system. These experiments support the implementation of GCA in mixtures analysis with endocrine disrupting compounds and establish PPAR $\gamma$  as an important target for further studies of chemical mixtures.

**Key words:** mixtures; PPAR $\gamma$ ; modeling; phthalates.

Exposure to environmental chemicals is rarely on a single-chemical basis, requiring risk assessments needing to address chemical mixtures. Because testing all mixture combinations is experimentally impossible, risk assessors and toxicologists use models that predict mixture effects from minimal data that may vary chemical-to-chemical, such as dose-response curves characterizing a compound's potency (eg, EC<sub>50</sub>) and efficacy (maximum response) when acting on a specific biological target.

Current chemical mixtures analysis for endocrine disrupting compounds emphasize concentration addition (also called dose addition) (US EPA, 2000), whereby individual component concentrations producing a given mixture effect are scaled by their proportion in the mixture and summed (Rajapakse *et al.*, 2001). This method is generally preferred for chemicals that act by similar mechanisms over models such as independent action

(IA) or effect summation (ES). For example, concentration addition may be applicable in cases of mixtures with components that act via the same molecular pathway, such as mixtures of dioxin-like polychlorinated biphenyls (PCBs) that act through the aryl hydrocarbon receptor (AhR), a ligand-activated transcription factor with one ligand-binding site.

Toxic equivalency factor (TEF) is a special case of concentration addition whereby the relative potency of a mixture component is used to generate an equivalent dose of a well-characterized reference compound (Safe, 1998). In cases where the dose-response curves of all the components differ only in potency (same shape and maximal effect), TEFs are generated by comparing the potency of each component to a reference compound, eg, 2,3,7,8-TCDD for the dioxin-like compounds (Safe, 1998). Toxic Equivalents use TEFs to calculate an

equivalent total dioxin dose. The effect of the mixture is then calculated from the dose-response curve of the dioxin. This model has the advantage of easy interpretation and implementation where reference chemical data are available, but crucially relies on the assumption that the dose-response curves of component chemicals differ only in potency; the assumptions for use of TEFs are violated when compounds differ in efficacy.

Howard and Webster (2009) introduced generalized concentration addition (GCA) to allow for differences in efficacy among mixture components. This model uses inverse mathematical functions allowing for some components to have submaximal efficacy. They demonstrated the utility of this model toward a mixture of AhR agonists with different efficacies (Howard et al., 2010). GCA accurately fit the experimental data of a full and a partial AhR agonist mixture, whereas TEF did not predict the competitive effect of a partial agonist at high concentrations in a mixture.

Current research has identified peroxisome proliferator-activated receptor gamma (PPAR $\gamma$ ) as an important target molecule in endocrine disruption and developmental biology. PPAR $\gamma$  is a nuclear receptor that acts as a metabolic sensor and forms an obligate, permissive heterodimer with the retinoid X receptor alpha (RXR $\alpha$ ) (Tontonoz et al., 1994). As the list of environmental toxicants that activate PPAR $\gamma$  grows in number and structural variety (Fang et al., 2015; Hurst and Waxman, 2003; Li et al., 2012; Riu et al., 2011; Springer et al., 2012), there is increasing concern over the influence of environmental chemical exposure on PPAR $\gamma$ -regulated endpoints, namely, lipid homeostasis (Feige et al., 2006), obesity (Janesick and Blumberg, 2011; Chamorro-García et al., 2013), and bone homeostasis (Baker et al., 2015; Lecka-Czernik et al., 1999; Watt and Schlezinger, 2015; Yanik et al., 2011). The extent of exposures and toxicological importance of PPAR $\gamma$  ligands further support the need for the development of flexible models to predict mixture effects.

Here, we tested the applicability of GCA in modeling mixture effects of full and partial PPAR $\gamma$  agonists and compared GCA's performance against the TEF, IA, and ES models. IA and ES are arguably inappropriate here: IA is intended to be applied when compounds act by different modes of action, while ES is generally considered inappropriate by mixtures toxicologists (Silva et al., 2002). However, investigators do not always know the mechanism of action, and it is not always clear how similar mechanisms need to be for CA to apply (Webster, 2013). It is therefore useful to see how these different models compare with GCA.

Using human PPAR $\gamma$ 1 and RXR $\alpha$  and a peroxisome proliferator response element-dependent luciferase reporter, we generated dose-responses for individual ligands. We predicted mixture effects using the different additivity models, and compared these predictions with experimental mixture results. We establish GCA as a model for predicting mixture effects of synthetic PPAR $\gamma$  agonists and show it to be a reasonable additive model of PPAR $\gamma$  activation by mixtures, including therapeutic drugs and phthalates that we identified as PPAR $\gamma$  agonists from the ToxCast data set.

## MATERIALS AND METHODS

### Chemical Suppliers

Rosiglitazone was obtained from Cayman Chemicals (Ann Arbor, Michigan). Nonthiazolidinedione partial agonist (nTZDpa) was from Tocris Biochemicals (Bristol, UK). Di-(2-ethylhexyl) phthalate (DEHP), mono-(2-ethylhexyl) phthalate

(MEHP), mono-butyl phthalate (MBP), butyl-benzyl phthalate (BBP), and mono-benzyl phthalate (MBzP) were obtained from Sigma (St Louis, Missouri).

### Reporter Assay

Cos7 cells were plated in 96-well plates and transiently transfected with human PPARG1 (provided by V.K. Chatterjee, University of Cambridge, Cambridge, UK) and human RXRA (plasmid 8882; Addgene, Cambridge, Massachusetts) (Tontonoz et al., 1994) expression vectors, with peroxisome proliferator response element 3x-TK-Luc (plasmid 1015; Addgene) (Kim et al., 1998) and cytomegalovirus-enhanced green fluorescent protein reporter using Lipofectamine 2000 (Invitrogen, Carlsbad, California). After overnight incubation at 37 °C, the media was replaced and cells received no treatment (medium only), Vh (dimethyl sulfoxide 0.1%), or PPAR $\gamma$  ligands at a range of concentrations either alone or in combination (rosiglitazone  $1 \times 10^{-10}$  M –  $1 \times 10^{-6}$  M; nTZDpa  $1 \times 10^{-9}$  M –  $5 \times 10^{-6}$  M; DEHP  $1 \times 10^{-7}$  M –  $2 \times 10^{-4}$  M; MEHP  $1 \times 10^{-7}$  M –  $1 \times 10^{-4}$  M; BBP  $1 \times 10^{-7}$  M –  $5 \times 10^{-4}$  M; MBP  $1 \times 10^{-7}$  M –  $5 \times 10^{-4}$  M; MBzP  $1 \times 10^{-7}$  M –  $5 \times 10^{-4}$  M). Concentrations of individual chemicals were chosen using pilot studies designed to identify the highest, nontoxic dose. After 24 hours of treatment, cells were lysed with GloLysis buffer and mixed with BrightGlo Luciferase buffer (Promega Inc, Madison, Wisconsin). Luminescence and fluorescence were determined using a Synergy2 plate reader (Biotek Inc, Winooski, Vermont). Luminescence of each well was normalized to green fluorescent protein-fluorescence, and the resulting values were normalized to medium-only wells to obtain fold change in PPAR $\gamma$  activation.

### ToxCast PPAR $\gamma$ Agonist Identification

ToxCast assay and chemical data were downloaded from EPA's ToxCast portal at (<http://www2.epa.gov/chemical-research/toxicity-forecaster-toxcastm-data>) in May of 2015 (US EPA, 2014). Chemicals were selected for inclusion that showed dose-response data fit with a monotonic Hill function in the Attagene PPRE\_cis\_up assay and the Attagene PPAR $\gamma$ \_trans\_up assays. To limit the selection to chemicals that did not also activate RXR $\alpha$ , these candidates were limited to those that fit RXR $\alpha$ -specific assays Odyssey Thera NURR1\_NURR1RXRa\_1440, Attagene RXRa\_TRANS\_up, and Odyssey Thera NURR1\_NURR1RXRa\_0480 with a constant (ie no response) model. Of the resulting 88 chemicals from this screening process, we identified 5 phthalates for testing, 2 parent phthalate compounds (DEHP and BBP) and 3 phthalate metabolites (MEHP, MBP, and MBzP).

### Experimental Fits

GCA requires specification of mathematical dose-response functions that are invertible yielding real numbers for all effect levels of interest. As in our previous work (Howard et al., 2010), we chose the function based on a biologically based model for binding of a ligand to a receptor at a single binding site followed by activation, where the degree of activation can depend on the ligand; the compounds we are investigating bind PPAR $\gamma$ , not RXR $\alpha$ . This model yields Hill functions with a Hill coefficient of 1. Individual chemical dose-response data were therefore fit to the following equation:

$$f([A]) = \min + (\max - \min)([A]) / (K_A + [A]), \quad (1)$$

where  $K_A$  is the macroscopic equilibrium constant for agonist A ( $EC_{50}$ , equal to the dose producing a 50% maximal effect), min

and max are the curve minimum and maximum effect levels, respectively, and [A] is the dose of ligand A. For mixtures experiments, data points were adjusted by subtracting the response value of Vh-only-treated wells, allowing the curves to be fit with a 2-parameter Hill function:  $f([A]) = \alpha_A([A]) / (K_A + [A])f$ , where  $\alpha_A$  is the maximum effect level.

### Toxic Equivalency Factor

TEF is a special case of concentration addition (and GCA) requiring parallel dose-response curves, including the same efficacy. When efficacies differ, TEFs will not in principle work. However, relative potencies may still be computed and may provide approximate answers in some cases (Howard et al., 2010) although results will depend on the choice of reference compound and its efficacy. For a reference compound, we used rosiglitazone, the compound with the highest potency and efficacy, and traditionally used as a positive control for PPAR $\gamma$  activity. The relative potency ( $\gamma_i$ ) is determined by  $\gamma_i = K_A/K_i$ , where A is the reference compound rosiglitazone. The total effect of the mixture, estimated for  $n$  components, is

$$E_{TEF} = f_A \left( [A] + \sum_{i=1}^n \gamma_i [X_i] \right) = \frac{\alpha_A \left( [A] + \sum_{i=1}^n \gamma_i [X_i] \right)}{K_A + \left( [A] + \sum_{i=1}^n \gamma_i [X_i] \right)} \quad (2)$$

### Generalized Concentration Addition

GCA relaxes the requirement of equal dose-response maxima. The general GCA equation for  $n$  components is

$$1 = \sum_{i=1}^n \frac{[X_i]}{f_i^{-1}(E)} \quad (3)$$

where  $f_i^{-1}(E)$  is the mathematical inverse of the individual chemical dose-response function and  $E$  is the mixture effect level. The inverse of the 2-parameter Hill function above is  $f_i^{-1}(E) = EK_i / (\alpha_i - E)$ , a function that yields real numbers for positive values of  $\alpha_i$ ,  $K_i$  and  $E$ . Substituting this equation into (3) allows for easy calculation of the effect level at a given mixture of  $n$  components with efficacies  $\alpha_i$  and  $EC_{50}$ s given by  $K_i$ :

$$E_{GCA} = f_{\text{mixture}}([X_1], \dots, [X_n]) = \frac{\sum_{i=1}^n \frac{\alpha_i [X_i]}{K_i}}{1 + \sum_{i=1}^n \frac{[X_i]}{K_i}} \quad (4)$$

Although (3) is the general definition of GCA, the form of (4) also depends on the specific dose-response function being modeled and may not apply more generally.

### Effect Summation and Independent Action

ES and IA are response-additive models that sum the individual responses, rather than the doses, of the mixture components. For ES

$$E_{ES} = f_{\text{mixture}}([X_1], \dots, [X_i]) = \sum_{i=1}^n f_i([X_i]) \quad (5)$$

IA is generally used for compounds that act by different mechanisms. IA assumes that compounds have the same maximal effect of one:

$$E_{IA} = f_{\text{mixture}}([X_1], \dots, [X_i]) = 1 - \prod_{i=1}^n (1 - f_i([X_i]))$$

When efficacies differ, the standard formula needs to be modified, and the best procedure is not clear. Following Payne et al (2001), we scaled the response of individual components to the maximum efficacy,  $\alpha_{\text{max}}$ , then scaled the overall results to the same maximum:

$$E_{IA} = f_{\text{mixture}}([X_1], \dots, [X_i]) = \alpha_{\text{max}} \left( 1 - \prod_{i=1}^n \left( 1 - \frac{f_i([X_i])}{\alpha_{\text{max}}} \right) \right) \quad (6)$$

The estimated maximum efficacy here was for MBzP, 7% larger than that of rosiglitazone (Figure 3B). Scaling components by their own maximums ( $\alpha_i$ ) produces predictions that are larger and closer to those provided by the TEF model (data not shown).

### Statistics and Software

Individual dose-response curves were fit and relevant parameters were estimated using Prism (version 6; GraphPad). Combination dose-response surfaces were generated in R using the `wireframe()` function. The R code for generating the additive model predictions is available at the Boston University Superfund Research Program website ([www.busrp.org](http://www.busrp.org)). Model extrapolations were performed in Mathematica (version 9.0.1.0; Wolfram Alpha). Differences in experimental distributions and model predicted distributions were tested using the nonparametric Wilcoxon rank-sum and Komolgorov-Smirnov tests.

## RESULTS

We began by establishing the dose-responses of 2 synthetic PPAR $\gamma$  ligands, rosiglitazone (full agonist) and nTZDpa (partial agonist). Cos-7 cells were transfected with expression vectors for human RXR $\alpha$  and PPAR $\gamma$ 1 and a luciferase reporter gene under transcriptional control of a direct repeat 1 peroxisome proliferator response element; cells were treated with each chemical separately and in combination. As shown in Figure 1A, the individual dose-response data were well fit by Hill functions with a Hill coefficient of 1 (the ‘‘S’’ shape of the data in the figure is partly due to plotting concentration on the log scale). nTZDpa and rosiglitazone stimulate PPAR $\gamma$  activation with similar potencies ( $EC_{50}$ s of  $2.2 \times 10^{-8}$  M and  $7.1 \times 10^{-8}$  M, respectively), which were comparable with established estimates ( $4.3 \times 10^{-8}$  M for rosiglitazone [Lehmann et al., 1995],  $5.7 \times 10^{-8}$  M for nTZDpa [Berger et al., 2003]). nTZDpa is a significantly less efficacious PPAR $\gamma$  ligand, with a response maximum of only approximately 17% of rosiglitazone (Figure 1A). A PPAR $\gamma$ -dominant negative construct suppresses luciferase gene expression stimulated by rosiglitazone in this system (Pillai et al., 2014), indicating that the increased luminescence as a function of concentration is due specifically to PPAR $\gamma$  binding and activation by the agonists.

We hypothesized that mixtures of rosiglitazone and nTZDpa would show a reduction in overall PPAR $\gamma$  activation at effect levels above the efficacy of nTZDpa, owing to the behavior of a partial agonist to act in the manner of a competitive antagonist in a mixture. Figure 1B demonstrates that at high effect levels, the response to rosiglitazone is antagonized and the overall activation of PPAR $\gamma$  by the mixture decreases: note that the  $1 \times 10^{-11}$  nTZDpa curve (solid line, black circles) closely approximates the rosiglitazone curve in Figure 1a, but increasing concentrations of nTZDpa reduce the curve closer to that of nTZDpa in Figure 1a. These data support the conclusion that nTZDpa is outcompeting rosiglitazone for PPAR $\gamma$  binding and that a higher proportion of partial agonist-bound receptors is attenuating the overall effect.

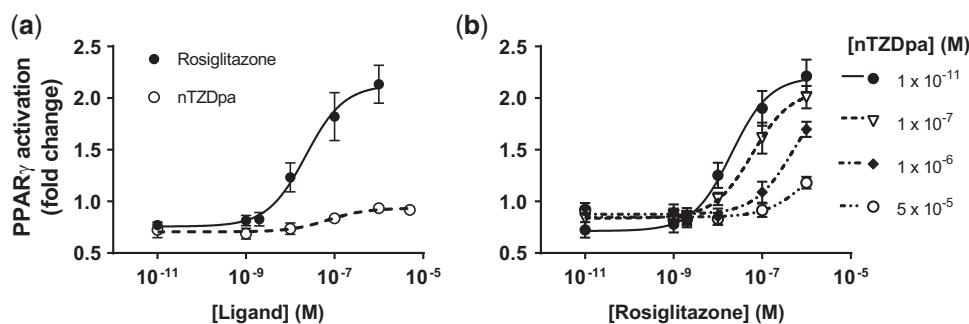

FIG. 1. The maximal response to rosiglitazone is decreased by high concentrations of nTZDpa. A, Individual (marginal) dose-response curves of rosiglitazone (full agonist) and nTZDpa (partial agonist). Cos-7 cells were transfected with peroxisome proliferator response element dependent  $3\times$  luciferase reporter as described in Materials and Methods and dosed with Vh (dimethyl sulfoxide) or the indicated concentrations of agonist. Green fluorescent protein-normalized luminescence was normalized to that of untreated culture wells.  $EC_{50}$  rosiglitazone:  $2.2 \times 10^{-8}$  M;  $EC_{50}$  nTZDpa:  $7.1 \times 10^{-8}$  M.  $N=4$  separate transfections. B, Dose-response curves of rosiglitazone in combination with increasing partial agonist concentration (error bars: SEM) ( $N=4$ ).

To compare the empirical dose response data with those predicted by different additive models, 3-dimensional response surfaces of PPAR $\gamma$  activation by the rosiglitazone/nTZDpa combinations were plotted (Figure 2). Marginal (ie, individual) dose-response curves lie along the front edges of the box (in bold) and combination effects comprise the interior surface. The antagonistic effect of nTZDpa is evident in the dose-response surface, with the surface dropping downward at high concentrations of nTZDpa and rosiglitazone (Figure 2A). Using individual-chemical fit parameters (listed in the embedded table in Figure 2), we generated predicted response surfaces under different additive models (ES, TEF, IA, and GCA).

The ES model, generated from equation 5, sums the individual effect levels of each combination of rosiglitazone and nTZDpa. At low concentration combinations, the ES surface approximates the empirical surface (Figure 2B). However, at high concentration combinations, the modeled surface implies supramaximal activation, as the effect of nTZDpa is added to the effect of rosiglitazone.

IA (equation 6) assumes the observed individual effects result from independent mechanisms of action. Like ES, at low concentration, the model approximates the empirical surface (Figure 2C). Higher concentration combinations begin to show the characteristic competitive antagonism effect of the full and partial ligand mixture, but the model fails to fully capture the reduction in overall effect.

TEF, defined in equation 2, assumes that the efficacies of rosiglitazone and nTZDpa are equal, and that nTZDpa is a diluted form of the more potent rosiglitazone. The modeled response surface generated by TEF shows no antagonistic effect of nTZDpa at high concentrations (Figure 2D).

Because GCA was formulated to allow for differences in efficacy among mixture components (Howard and Webster, 2009), we hypothesized that the surface generated by GCA would most accurately resemble the empirical surface. The GCA-modeled surface (equation 4) captures the attenuating effect of high concentrations of nTZDpa (Figure 2E). The nonparametric Wilcoxon rank-sum and Komolgorov-Smirnov tests indicate that the distribution of GCA-modeled estimates is not significantly different from empirical results ( $P > .05$ ), whereas the TEF and ES distributions do differ significantly from the experimental data ( $P > .01$  for both comparisons). Generation of modeled distributions using the upper and lower bounds of the experimental standard errors resulted in minimal changes to the modeled estimates (Supplementary Figure S1). From these results, we concluded that GCA is a viable model for predicting

combination effects of 2 PPAR $\gamma$ -specific agonists that have different efficacies.

Next, we tested the applicability of GCA in modeling PPAR $\gamma$  activation stimulated by mixtures of environmental ligands. From EPA's ToxCast data set, we identified potential PPAR $\gamma$  agonists, including 5 phthalate compounds: DEHP, BBP, MEHP, MBP, and MBzP. Individually, all but DEHP activated PPAR $\gamma$  in our assay. Table 1 lists the efficacy (as maximum-minimum) and potency ( $EC_{50}$ ) derived from the dose-response curve of each parent (Figure 3A) and metabolite (Figure 3B) compound. Although the potencies were mostly within the same order of magnitude (with MBzP being slightly less potent than the other phthalates), the efficacies varied roughly 4-fold between the least (MBP) and most efficacious (MBzP).

We began by testing an array of rosiglitazone (full agonist) and MEHP (partial agonist) combinations. Similar to rosiglitazone and nTZDpa mixtures, MEHP increases PPAR $\gamma$  activation at low effect levels (Figure 3C, left side), but antagonizes the PPAR $\gamma$  activation stimulated by rosiglitazone at higher effect levels, reducing the mixture activation of PPAR $\gamma$  to the response maximum of MEHP (Figure 3C, right side). The predictions of GCA fit the observed data somewhat better than the TEF model at high concentration combinations where a small amount of antagonism by MEHP becomes evident (Figs. 3-F). The difference between the 2 models is not as stark as that for the rosiglitazone/nTZDpa mixture (Figure 2). The reason is that the estimated efficacy for MEHP is 80% that of rosiglitazone, far closer in maximal effect compared to nTZDpa.

Next, we tested a complex mixture of phthalates. We hypothesized that, given the different efficacies among the phthalates, GCA would again provide the most accurate fit, whereas the response-additive models and TEF would overestimate the mixture effect. To test this hypothesis, we constructed 2 mixtures of multiple phthalates. Because of the logistical complication of testing mixtures with  $>2$  components, we used ray designs in which each component is in constant proportion to one another across mixture dilutions. We excluded DEHP from the rays because of its lack of activity in the PPAR $\gamma$  activation assay. The starting solution for the first ray (A) consisted of BBP, MEHP, MBP, and MBzP at concentrations just below their respective  $EC_{10}$  values, as determined by their individual dose-responses (Table 2). The starting solution for the second ray (B) combined the 4 phthalates at concentrations that produced the same effect level as 10% of rosiglitazone's maximum effect (Table 2). Each mixture was diluted by factors of 2, 5, 10, 20, 50, and 100, and the dilution series were applied in the PPAR $\gamma$

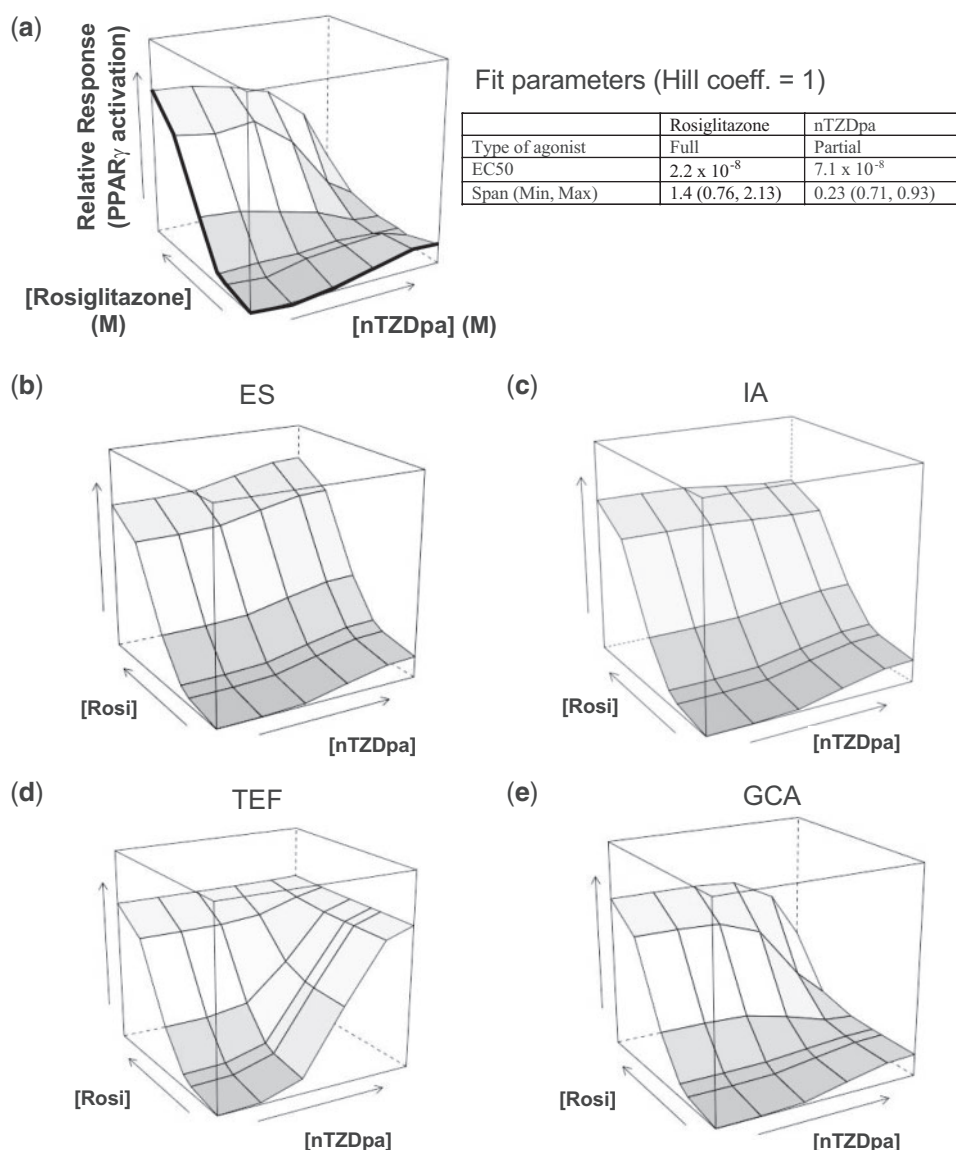

FIG. 2. Generalized concentration addition (GCA) provides an accurate prediction of full and partial PPAR<sub>γ</sub> agonist mixture effects. A. Experimental joint dose-response surface of rosiglitazone and nTZDpa dose combinations. Vertical axis: fold change in PPAR<sub>γ</sub> activation over untreated cultures (linear). Marginal curves correspond to individual dose-response curves shown in Figure 1. B. Effect summation (ES), (C) independent Action (IA), (D) toxic equivalency factor (TEF), and (E) GCA model fits based on parameters (with Hill coefficient constrained at 1.0) listed in embedded table and formulations listed in Materials and Methods.

activation assay. Using the individual dose-response parameters listed in Table 1, mixture responses also were predicted using the ES, TEF, GCA, and IA models.

The starting concentrations of mixtures A and B produced effect levels that were 7% and 30% higher, respectively, than the predicted individual effect of the most efficacious component (MBzP) at the concentration at which it was added to each mixture ( $1.6 \times 10^{-5}$  M; Table 2). By the second and fourth dilutions of ray A and B, respectively, the activation of PPAR<sub>γ</sub> by the mixture was indistinguishable from baseline (Figs. 4A and b). At low concentrations, all 4 models—GCA, TEF, ES, and IA—adequately fit the empirical data. At higher concentrations, the TEF predictions strongly diverge from the observed data, whereas GCA may provide a slightly better fit than ES and IA. Figure 4C provides a closer comparison of the starting mixture concentrations and the modeled values.

To examine the behavior of these models at high concentrations, we used the same fitting parameters to extrapolate models to high concentration levels for ray A. As shown in Figure 5, the models diverge with increasing mixture concentration. At high mixture concentration, the ES model vastly exceeds the other models. Both the TEF and IA models overestimate effects compared with GCA; this occurs in part because only GCA takes into account the antagonistic effect of partial agonists.

## DISCUSSION

Current methods for estimating risk from chemical exposure predominately focus on single chemical exposure instead of the more realistic scenario of coexposure to multiple chemicals. At the same time, several agencies are recognizing the need to

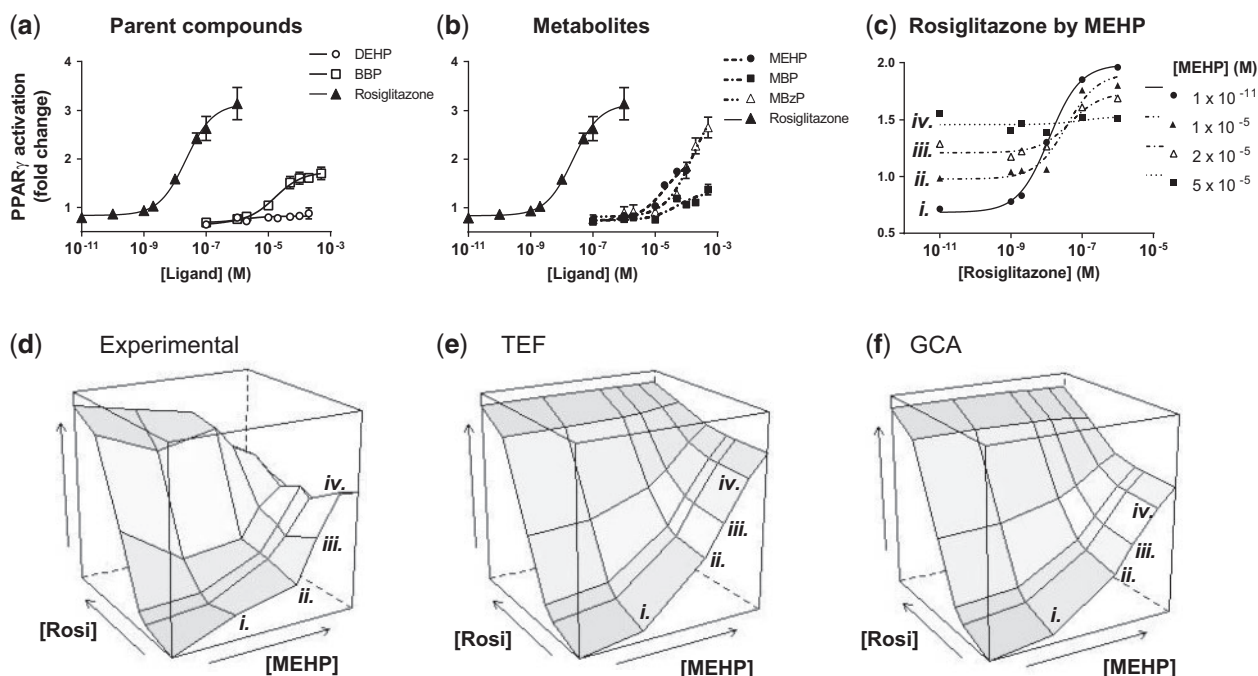

FIG. 3. Phthalate esters activate PPAR $\gamma$  with varying efficacies. Cos-7 cells were transfected with a peroxisome proliferator response element-dependent 3 $\times$  luciferase reporter as described in Materials and Methods and dosed with Vh (dimethyl sulfoxide) or the indicated concentrations of agonists. Green fluorescent protein normalized luminescence was normalized to that of untreated culture wells. Positive control data (rosiglitazone) is included for comparison. *N* = 4 separate transfections. A. Dose-response curves of parent phthalates DEHP and BBP. B. Dose-response curves of metabolite phthalate compounds MEHP, MBP, and MBzP. C. Rosiglitazone dose-response curves with increasing concentrations of MEHP. Error bars omitted for clarity. All curves were fit with a 3-parameter Hill equation (with Hill coefficient constrained at 1). Dose-response parameters for phthalate components are listed in Table 1. D. Experimental dose-response surface of rosiglitazone/MEHP mixture. E. TEF-predicted surface. F. GCA-predicted surface. Interior values predicted using parameters derived from A (rosiglitazone EC $_{50}$ :  $2.3 \times 10^{-8}$  M) and Table 1. Rosiglitazone dose-response curves by increasing MEHP are labeled i–iv, to facilitate comparison to C.

TABLE 1. Modeled Parameters for Phthalate Compounds From Dose-Response Fits Using 3-Parameter Hill equation (With Hill Coefficient of 1) (Figs. 3A and B)

|                                                                                | DEHP | MEHP                                                                    | BBP                                                                     | MBP                                                                     | MBzP                                                                    |
|--------------------------------------------------------------------------------|------|-------------------------------------------------------------------------|-------------------------------------------------------------------------|-------------------------------------------------------------------------|-------------------------------------------------------------------------|
| EC $_{50}$ (M) (95% CI)                                                        | N.D. | $2.2 \times 10^{-5}$<br>( $9.8 \times 10^{-6}$ , $4.7 \times 10^{-5}$ ) | $1.7 \times 10^{-5}$<br>( $7.9 \times 10^{-6}$ , $3.6 \times 10^{-5}$ ) | $5.1 \times 10^{-5}$<br>( $1.5 \times 10^{-5}$ , $1.7 \times 10^{-4}$ ) | $1.6 \times 10^{-4}$<br>( $8.3 \times 10^{-5}$ , $3.0 \times 10^{-4}$ ) |
| Span (max-min) (95% CI)                                                        | N.D. | 1.3 (1.0–1.6)                                                           | 1.0 (0.89–1.2)                                                          | 0.61 (0.42–0.79)                                                        | 2.5 (1.9–3.1)                                                           |
| Efficacy relative to rosiglitazone maximum (2.3-fold change (95% CI, 2.0–2.6)) | N.D. | 0.56                                                                    | 0.43                                                                    | 0.26                                                                    | 1.1                                                                     |
| R $^2$                                                                         | N.D. | 0.87                                                                    | 0.88                                                                    | 0.71                                                                    | 0.90                                                                    |

Abbreviation: CI, confidence interval; N.D., not detected.

Because of the minimal efficacy and poor statistical fit, DEHP was considered to be inactive for the purpose of the mixture experiments. 95% CI associated with fit estimate. Span: difference in estimated curve maximum and curve minimum (equation 1).

Table 2. Phthalate Components of Mixture Rays

|       |                                    | MEHP                 | BBP                  | MBP                  | MBzP                 | Stock Mixture Concentration (Total) |
|-------|------------------------------------|----------------------|----------------------|----------------------|----------------------|-------------------------------------|
| Ray A | Concentration (M) in stock mixture | $2.2 \times 10^{-6}$ | $1.7 \times 10^{-6}$ | $4.3 \times 10^{-6}$ | $1.6 \times 10^{-5}$ | $2.4 \times 10^{-5}$ M              |
|       | Effect level % max                 | 9.3                  | 9.2                  | 7.7                  | 9.5                  |                                     |
| Ray B | Concentration (M) in stock mixture | $3.8 \times 10^{-6}$ | $3.7 \times 10^{-6}$ | $1.5 \times 10^{-5}$ | $1.6 \times 10^{-5}$ | $3.9 \times 10^{-5}$ M              |
|       | Effect level % max                 | 15                   | 18                   | 23                   | 9.4                  |                                     |

DEHP excluded from rays (see footnote in Table 1).

Ray A: phthalates mixed at initial concentrations below the calculated EC $_{10}$  from individual dose-response curves. Ray B: phthalates mixed at initial concentrations producing the equivalent effect as rosiglitazone's EC $_{10}$  from control dose-response curve (Figs. 3A and B).

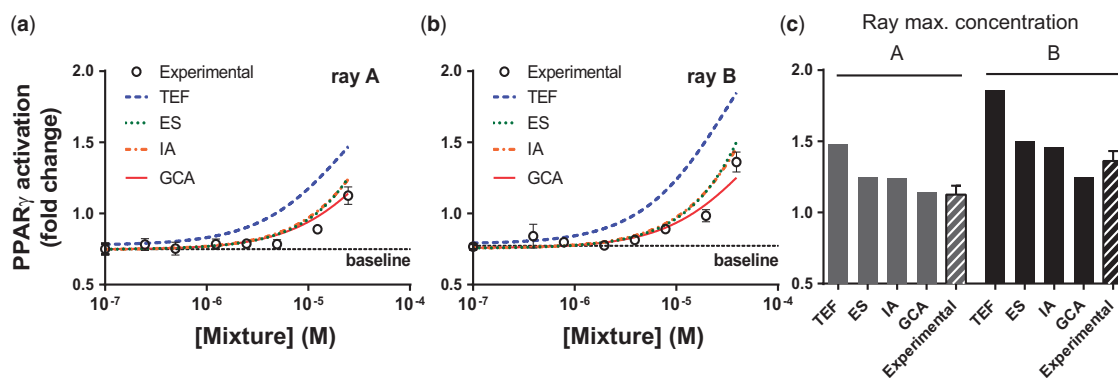

FIG. 4. Comparison of experimentally determined PPAR $\gamma$  activation with model predictions. A. Phthalates combined at starting concentrations below individual EC $_{10}$ 's. B. Phthalates combined at starting concentrations producing effect levels equal to 10% of rosiglitazone's maximal effect. C. Comparison of rays and models at highest concentrations. Ray design specifications listed in Table 2. Experimental data N=4 separate transfections, mean  $\pm$  SEM. Baseline: Experimental curve fit estimated minimum (experimental curve fit omitted for clarity).

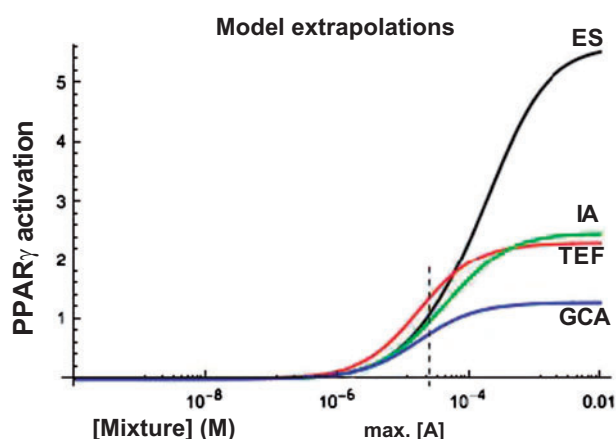

FIG. 5. Extrapolations of modeled dose-responses to high concentrations for ray A. Vertical line: maximum mixture concentration tested (Figure 4A).

focus research on low dose exposures to endocrine disrupting chemicals that act via inappropriate activation of nuclear receptors (Carlin *et al.*, 2013; Reif *et al.*, 2010; World Health Organization, 2013). One such nuclear receptor is PPAR $\gamma$ , which plays a central role in toxic mechanisms related to lipid homeostasis, bone quality, and other endpoints (Ahmadian *et al.*, 2013). Given its status as a target of endocrine disruption by a variety of environmental agonists, PPAR $\gamma$  is an important model for which to study chemical co-exposures and develop ways to predict toxicity of chemical mixtures. Here, we established the utility of GCA (Howard and Webster, 2009) in modeling joint effects of chemical coexposures that activate PPAR $\gamma$ .

The experimental design used to generate experimental mixture data and test the additive models was similar to that of Howard *et al.* (2010), who used GCA to model mixture effects of AhR agonists. In that study, they showed experimentally that the partial AhR agonist (galangin) could decrease the overall mixture effect when combined with a full AhR agonist (PCB126). This effect of galangin resembled that of a competitive antagonist. The difference is that a partial agonist increases the mixture effect at levels below its efficacy, but decreases the mixture effect at levels above its efficacy.

We began by testing the utility of GCA in predicting the activation of PPAR $\gamma$  by a mixture containing a full (rosiglitazone) and partial (nTZDpa) agonist. At high combined concentrations,

the activation of PPAR $\gamma$  was reduced by nTZDpa, and this was predicted by GCA (Figure 2D). Because of overt toxicity and the comparable potencies between rosiglitazone and nTZDpa, nTZDpa could not be added to a level that fully reduced the activity of the mixture to that of the maximum effect of nTZDpa. However, GCA was able to model the decrease in mixture effect, whereas the TEF model, in assuming equal efficacy between the 2 components (and using rosiglitazone as the reference compound), inflated the effect of high concentrations of nTZDpa (Figure 2C). ES and IA proved inadequate as well (Figure 2A). These results indicate that GCA is a viable model in the case of a mixture of 2 chemicals designed specifically as PPAR $\gamma$  ligands.

Phthalates comprise a group of chemicals designed for use in consumer products and manufacturing but also show biological activity. Manufactured at high volume for use as plasticizing agents and flame retardants, phthalates can act on numerous targets, especially in the male reproductive system (Dalgaard *et al.*, 2001; Howdeshell *et al.*, 2008; Parks *et al.*, 2000). Specific phthalate esters (MEHP, MBzP, MBP, and BBP) have also been shown to activate peroxisome proliferator (Hurst and Waxman, 2003; Pereira-Fernandes *et al.*, 2013). Exposure to phthalates is widespread and detected in human biomonitoring data, including National Health and Nutrition Examination Survey (Buser *et al.*, 2014; Hatch *et al.*, 2010). Parent phthalate compounds such as DEHP and BBP undergo biotransformation to multiple metabolites following absorption, making phthalate mixtures biologically relevant (Langer *et al.*, 2014; Zota *et al.*, 2014). Typically, phthalate metabolites are more biologically active than the parent compounds with regard to activation of PPARs (Cornu *et al.*, 1992; Hurst and Waxman, 2003).

To identify phthalates that activate PPAR $\gamma$ , we used EPA's ToxCast database (US EPA, 2014). Because our assay uses a transfected luciferase reporter construct under the transcriptional control of a peroxisome proliferator response element, we selected compounds that activated an equivalent model assay in ToxCast. To increase the specificity for identifying PPAR $\gamma$  ligands, we included chemicals that also activated a PPAR $\gamma$  ligand binding domain fused with a Gal-4 reporter, and excluded chemicals that showed any activity in assays for PPAR $\gamma$ 's permissive heterodimer partner, RXR $\alpha$ . Contrary to the ToxCast screen, DEHP did not activate PPAR $\gamma$  transcriptional activity in our assay. We speculate that this is due to differences in the source of the cell line (human liver in ToxCast, African Green monkey for Cos-7 cells in our assay)

although others have shown that DEHP does not activate human PPAR $\gamma$  *in vitro* (Hurst and Waxman, 2003).

In a binary mixture, MEHP reduced the activation of PPAR $\gamma$  by rosiglitazone at higher concentrations of both compounds, which was predicted by GCA (Figs. 3C and F). GCA also accurately predicted the activation of PPAR $\gamma$  by a more complex phthalate mixture. However, ES, IA, and TEF all approximated GCA and fit the observed data at low concentrations of both rays. In contrast to our results, Silva *et al.* (2002) demonstrated that ES and IA do not sufficiently predict mixture effects of estrogen receptor full agonists at low concentrations; this is caused by the nonlinear shape of the dose-response curves for these compounds at low doses. Our dose-response data are nearly linear at low concentrations (equation 1). As a result, the predictions of ES and IA approximate those of GCA. One would not expect the dramatic “Something from Nothing” effect that can occur with mixtures that have linear dose-response curves (Silva *et al.*, 2002).

When we extrapolate these models to higher concentration levels of the phthalate mixture (where the dose-response curve departs from linearity), we see considerable divergence among the models (Figure 5). We also see this pattern in the ES prediction of the mixture of rosiglitazone and nTZDpa (Figure 2A), where ES overestimates the effect of the mixture at high concentrations.

GCA requires that the user specify a dose-response function that can be inverted, yielding real numbers for effect levels of interest. Based on the biological mechanism of PPAR $\gamma$ , where ligands bind the receptor at a single site, we used a Hill function with a Hill coefficient of 1 (Howard *et al.*, 2010; Howard and Webster, 2009). This function meets the invertibility requirement. Some scenarios may warrant fitting dose-response data with different dose-response functions. For example, ligands for receptors that homodimerize (e.g., estrogen receptor) would be expected to be nonlinear at low dose. We would not expect such data to be adequately fit by a Hill function with a Hill coefficient of 1; on the other hand, use of a Hill function of 2 would violate the invertibility requirement needed for applying GCA to partial agonists. We are currently working on appropriate biologically based models for these types of systems. GCA may not be applicable to all mixtures of full and partial agonists. Accordingly, careful consideration should be placed on properly specifying the individual dose-response functions.

As an alternative to GCA, Scholze *et al.* (2014) introduced the Toxic Unit Extrapolation model for predicting the joint effect of a mixture that includes partial agonists, and applied it to ligands of the estrogen receptor. However, toxic unit extrapolation does not account for the antagonistic effect of partial agonists at high doses; this effect may in principle occur even when there are 2 binding sites as in a homodimer. We attempted to limit our biological mechanism exclusively to PPAR $\gamma$ -specific binding via our selection of candidate compounds. Future work will address whether concentration additive models are appropriate for cases involving agonist mixtures that activate separate components of permissive heterodimers, or whether it is better fit by an IA model.

Although TEF overestimates the mixture response, the model does have the advantage of easy interpretability and use, as each component is treated as a dilution of a well-characterized reference compound (for PPAR $\gamma$ , we used rosiglitazone). For regulatory purposes, TEF would provide conservative estimates that may be of use to risk assessors, where applicable. On the other hand, the model prediction is dependent on the choice of reference compound and its efficacy; the model overestimation will increase

with increasing efficacy of the reference compound. Given the variety of sources, structures, and pharmacodynamics (Tan *et al.*, 2012) of PPAR $\gamma$  agonists, the choice of a “correct” reference compound for PPAR $\gamma$  agonism is not clear.

Realistic exposures to environmental endocrine disrupting compounds tend to be at low concentrations, where GCA, TEF, IA, and ES produced similar results for PPAR $\gamma$  ligands. However, GCA produced estimates quite different from the other models when the mixture concentration was extrapolated to high doses. For PPAR $\gamma$  ligands, GCA may be particularly useful in determining effects of interactions between environmental exposures and therapeutic treatments. PPAR $\gamma$  already serves as a relevant model for this type of mixture, given its well-established role as a target for insulin-sensitizing drugs. For example,  $C_{max}$  estimates of rosiglitazone in human blood during therapeutic use range from 200 nM to 1.2  $\mu$ M (Avandia, Rx List website), concentrations that fall within the drug’s maximal efficacy for PPAR $\gamma$  activation. When co-exposure to low efficacy environmental PPAR $\gamma$  ligands occurs, the efficacy of the administered therapeutic may be reduced. Given the breadth of PPAR $\gamma$ ’s biologic influence and the increasing number of identified ligands in the indoor and outdoor environment, future studies should characterize mixture effects on relevant endpoints under control of PPAR $\gamma$  activation, such as insulin sensitivity and lipid accumulation, to better inform the biology behind predictive models.

## SUPPLEMENTARY DATA

Supplementary data are available online at <http://toxsci.oxfordjournals.org/>.

## FUNDING

This work was supported by the National Institute of Environmental Health Sciences Superfund Research Program (P42ES007381).

## REFERENCES

- Ahmadian, M., Suh, J. M., Hah, N., Liddle, C., Atkins, A. R., Downes, M., and Evans, R. M. (2013). PPAR $\gamma$  signaling and metabolism: the good, the bad and the future. *Nat. Med* **19**, 557–566.
- Avandia (Rosiglitazone maleate) Drug Information. RxList website. Available at: <http://www.rxlist.com/avandia-drug/clinical-pharmacology.htm>. Accessed February 11, 2016.
- Baker, A. H., Watt, J., Huang, C. K., Gerstenfeld, L. C., and Schlezinger, J. J. (2015). Tributyltin engages multiple nuclear receptor pathways and suppresses osteogenesis in bone marrow multipotent stromal cells. *Chem. Res. Toxicol* **28**, 1156–1166.
- Berger, J. P., Petro, A. E., Macnaul, K. L., Kelly, L. J., Zhang, B. B., Richards, K., Elbrecht, A., Johnson, B. A., Zhou, G., Doebber, T. W., *et al.* (2003). Distinct Properties and Advantages of a Novel Peroxisome Proliferator-Activated Protein Selective Modulator. *Mol. Endocrinol* **17**, 662–676.
- Buser, M. C., Murray, H. E., and Scinicariello, F. (2014). Age and sex differences in childhood and adulthood obesity association with phthalates: analyses of NHANES 2007–2010. *Int. J. Hyg. Environ. Health* **217**, 687–694.
- Carlin, D. J., Rider, C. V., Woychik, R., and Birnbaum, L. S. (2013). Unraveling the Health Effects of Environmental Mixtures: An NIEHS Priority. *Environ. Health Perspect* **121**, A6–A8.



- Chamorro-García, R., Sahu, M., Abbey, R. J., Laude, J., Pham, N., and Blumberg, B. (2013). Transgenerational inheritance of increased fat depot size, stem cell reprogramming, and hepatic steatosis elicited by prenatal exposure to the obesogen tributyltin in mice. *Environ. Health Perspect* **121**, 359–366.
- Cornu, M. C., Lhuguenot, J. C., Brady, A. M., Moore, R., and Elcombe, C. R. (1992). Identification of the proximate peroxisome proliferator(s) derived from di (2-ethylhexyl) adipate and species differences in response. *Biochem. Pharmacol* **43**, 2129–2134.
- Dalgaard, M., Nellemann, C., Lam, H. R., Sørensen, I. K., and Ladefoged, O. (2001). The acute effects of mono(2-ethylhexyl)phthalate (MEHP) on testes of prepubertal Wistar rats. *Toxicol. Lett* **122**, 69–79.
- Fang, M., Webster, T. F., Ferguson, P. L., and Stapleton, H. M. (2015). Characterizing the peroxisome proliferator-activated receptor (PPAR $\gamma$ ) ligand binding potential of several major flame retardants, their metabolites, and chemical mixtures in house dust. *Environ. Health Perspect* **123**, 166–172.
- Feige, J. N., Gelman, L., Michalik, L., Desvergne, B., and Wahli, W. (2006). From molecular action to physiological outputs: peroxisome proliferator-activated receptors are nuclear receptors at the crossroads of key cellular functions. *Prog. Lipid Res* **45**, 120–159.
- Hatch, E. E., Nelson, J. W., Stahlhut, R. W., and Webster, T. F. (2010). Association of endocrine disruptors and obesity: perspectives from epidemiological studies. *Int. J. Androl* **33**, 324–332.
- Howard, G. J., and Webster, T. F. (2009). Generalized concentration addition: a method for examining mixtures containing partial agonists. *J. Theor. Biol* **259**, 469–477.
- Howard, G. J., Schlezinger, J. J., Hahn, M. E., and Webster, T. F. (2010). Generalized concentration addition predicts joint effects of aryl hydrocarbon receptor agonists with partial agonists and competitive antagonists. *Environ. Health Perspect* **118**, 666–672.
- Howdeshell, K. L., Wilson, V. S., Furr, J., Lambright, C. R., Rider, C. V., Blystone, C. R., Hotchkiss, A. K., and Gray L. E. Jr. (2008). A mixture of five phthalate esters inhibits fetal testicular testosterone production in the sprague-dawley rat in a cumulative, dose-additive manner. *Toxicol. Sci* **105**, 153–165.
- Hurst, C. H., and Waxman, D. J. (2003). Activation of PPAR $\alpha$  and PPAR $\gamma$  by environmental phthalate monoesters. *Toxicol. Sci* **74**, 297–308.
- Janesick, A., and Blumberg, B. (2011). Minireview: PPAR $\gamma$  as the target of obesogens. *J. Steroid Biochem. Mol. Biol.* **127**, 4–8.
- Kim, J. B., Wright, H. M., Wright, M., and Spiegelman, B. M. (1998). ADD1/SREBP1 activates PPAR $\gamma$  through the production of endogenous ligand. *Proc. Natl. Acad. Sci. U.S.A.* **95**, 4333–4337.
- Langer, S., Bekö, G., Weschler, C. J., Brive, L. M., Toftum, J., Callesen, M., and Clausen, G. (2014). Phthalate metabolites in urine samples from Danish children and correlations with phthalates in dust samples from their homes and daycare centers. *Int. J. Hyg. Environ. Health* **217**, 78–87.
- Lecka-Czernik, B., Gubrij, I., Moerman, E. J., Kajkenova, O., Lipschitz, D. A., Manolagas, S. C., and Jilka, R. L. (1999). Inhibition of *Osf2/Cbfa1* expression and terminal osteoblast differentiation by PPAR $\gamma$ . *J. Cell Biochem.* **74**, 357–371.
- Lehmann, J. M., Moore, L. B., Smith-Oliver, T. A., Wilkison, W. O., Willson, T. M., and Kliewer, S. A. (1995). An antidiabetic thiazolidinedione is a high affinity ligand for peroxisome proliferator-activated receptor  $\gamma$  (PPAR $\gamma$ ). *J. Biol. Chem.* **270**, 12953–12956.
- Li, X., Pham, H. T., Janesick, A. S., and Blumberg, B. (2012). Triflumizole is an obesogen in mice that acts through peroxisome proliferator activated receptor gamma (PPAR $\gamma$ ). *Environ. Health Perspect* **120**, 1720–1726.
- Parks, L. G., Ostby, J. S., Lambright, C. R., Abbott, B. D., Klinefelter, G. R., Barlow, N. J., and Gray L. E. Jr. (2000). The plasticizer diethylhexyl phthalate induces malformations by decreasing fetal testosterone synthesis during sexual differentiation in the male rat. *Toxicol. Sci.* **58**, 339–349.
- Payne, J., Scholze, M., and Kortenkamp, A. (2001). Mixtures of four organochlorines enhance human breast cancer cell proliferation. *Environ. Health Perspect.* **109**, 391–397.
- Pereira-Fernandes, A., Demaegdt, H., Vandermeiren, K., Hectors, T. L., Jorens, P. G., Blust, R., and Vanparys, C. (2013). Evaluation of a screening system for obesogenic compounds: screening of endocrine disrupting compounds and evaluation of the PPAR dependency of the effect. *PLoS One* **8**, e77481.
- Pillai, H. K., Fang, M., Beglov, D., Kozakov, D., Vajda, S., Stapleton, H. M., Webster, T. F., and Schlezinger, J. J. (2014). Ligand binding and activation of PPAR $\gamma$  by Firemaster® 550: effects on adipogenesis and osteogenesis in vitro. *Environ. Health Perspect.* **122**, 1225–1232.
- Rajapakse, N., Ong, D., and Kortenkamp, A. (2001). Defining the impact of weakly estrogenic chemicals on the action of steroidal estrogens. *Toxicol. Sci.* **60**, 296–304.
- Reif, D. M., Martin, M. T., Tan, S. W., Houck, K. A., Judson, R. S., Richard, A. M., Knudsen, T. B., Dix, D. J., and Kavlock, R. J. (2010). Endocrine profiling and prioritization of environmental chemicals using ToxCast data. *Environ. Health Perspect.* **118**, 1714–1720.
- Riu, A., Grimaldi, M., le Maire, A., Bey, G., Phillips, K., Boulahtouf, A., Perdu, E., Zalko, D., Bourguet, W., and Balaguer, P. (2011). Peroxisome proliferator-activated receptor  $\gamma$  is a target for halogenated analogs of bisphenol A. *Environ. Health Perspect.* **119**, 1227–1232.
- Safe, S. H. (1998). Hazard and risk assessment of chemical mixtures using the toxic equivalency factor approach. *Environ. Health Perspect.* **106(Suppl 4)**, 1051–1058.
- Scholze, M., Silva, E., and Kortenkamp, A. (2014). Extending the applicability of the dose addition model to the assessment of chemical mixtures of partial agonists by using a novel toxic unit extrapolation method. *PLoS One* **9**, e88808.
- Silva, E., Rajapakse, N., and Kortenkamp, A. (2002). Something from “nothing”—eight weak estrogenic chemicals combined at concentrations below NOECs produce significant mixture effects. *Environ. Sci. Technol.* **36**, 1751–1756.
- Springer, C., Dere, E., Hall, S. J., McDonnell, E. V., Roberts, S. C., Butt, C. M., Stapleton, H. M., Watkins, D. J., McClean, M. D., Webster, T. F., et al. (2012). Rodent thyroid, liver, and fetal testis toxicity of the monoester metabolite of bis-(2-ethylhexyl) tetrabromophthalate (tbph), a novel brominated flame retardant present in indoor dust. *Environ. Health Perspect.* **120**, 1711–1719.
- Tan, Y., Muise, E. S., Dai, H., Raubertas, R., Wong, K. K., Thompson, G. M., Wood, H. B., Meinke, P. T., Lum, P. Y., Thompson, J. R., and, et al. (2012). Novel transcriptome profiling analyses demonstrate that selective peroxisome proliferator-activated receptor  $\gamma$  (PPAR $\gamma$ ) modulators display attenuated and selective gene regulatory activity in comparison with PPAR $\gamma$  full agonists. *Mol. Pharmacol.* **82**, 68–79.
- Tontonoz, P., Hu, E., Graves, R. A., Budavari, A. I., and Spiegelman, B. M. (1994). mPPAR gamma 2: tissue-specific regulator of an adipocyte enhancer. *Genes Dev.* **8**, 1224–1234.
- US EPA (2000). Supplemental Guidance for Conducting Health Risk Assessment of Chemical Mixtures. Published August 2000.

- US EPA (2014). ToxCast & Tox21 Summary Files from invitrodb\_v1. Retrieved from <http://www2.epa.gov/chemical-research/toxicity-forecaster-toxcasttm-data>. Accessed December 19, 2015.
- Watt, J., and Schlezinger, J. J. (2015). Structurally-diverse, PPAR-activating environmental toxicants induce adipogenesis and suppress osteogenesis in bone marrow mesenchymal stromal cells. *Toxicology* **331**, 66–77.
- Webster, T. F. (2013). Mixtures of endocrine disruptors: How similar must mechanisms be for concentration addition to apply? *Toxicology* **313**, 129–133.
- World Health Organization (WHO) (2013). State of the science of endocrine disrupting chemicals – 2012. Available at <http://www.who.int/ceh/publications/endocrine/en/>. Accessed December 19, 2015.
- Yanik, S. C., Baker, A. H., Mann, K. K., and Schlezinger, J. J. (2011). Organotins are potent activators of PPAR $\gamma$  and adipocyte differentiation in bone marrow multipotent mesenchymal stromal cells. *Toxicol. Sci* **122**, 476–488.
- Zota, A. R., Calafat, A. M., and Woodruff, T. J. (2014). Temporal trends in phthalate exposures: findings from the National Health and Nutrition Examination Survey, 2001-2010. *Environ Health Perspect* **122**, 235–241.
